# Supplementary material
Source: publisher figshare collection journal article supplement (https://gsajournals.figshare.com/ndownloader/files/20026301)
Supplement: Supplementary file 1 [file 20026301]

Figure S1. Histogram of nuclei sizes generated from flow cytometry indicating different ploidy levels of various *Camelina* species


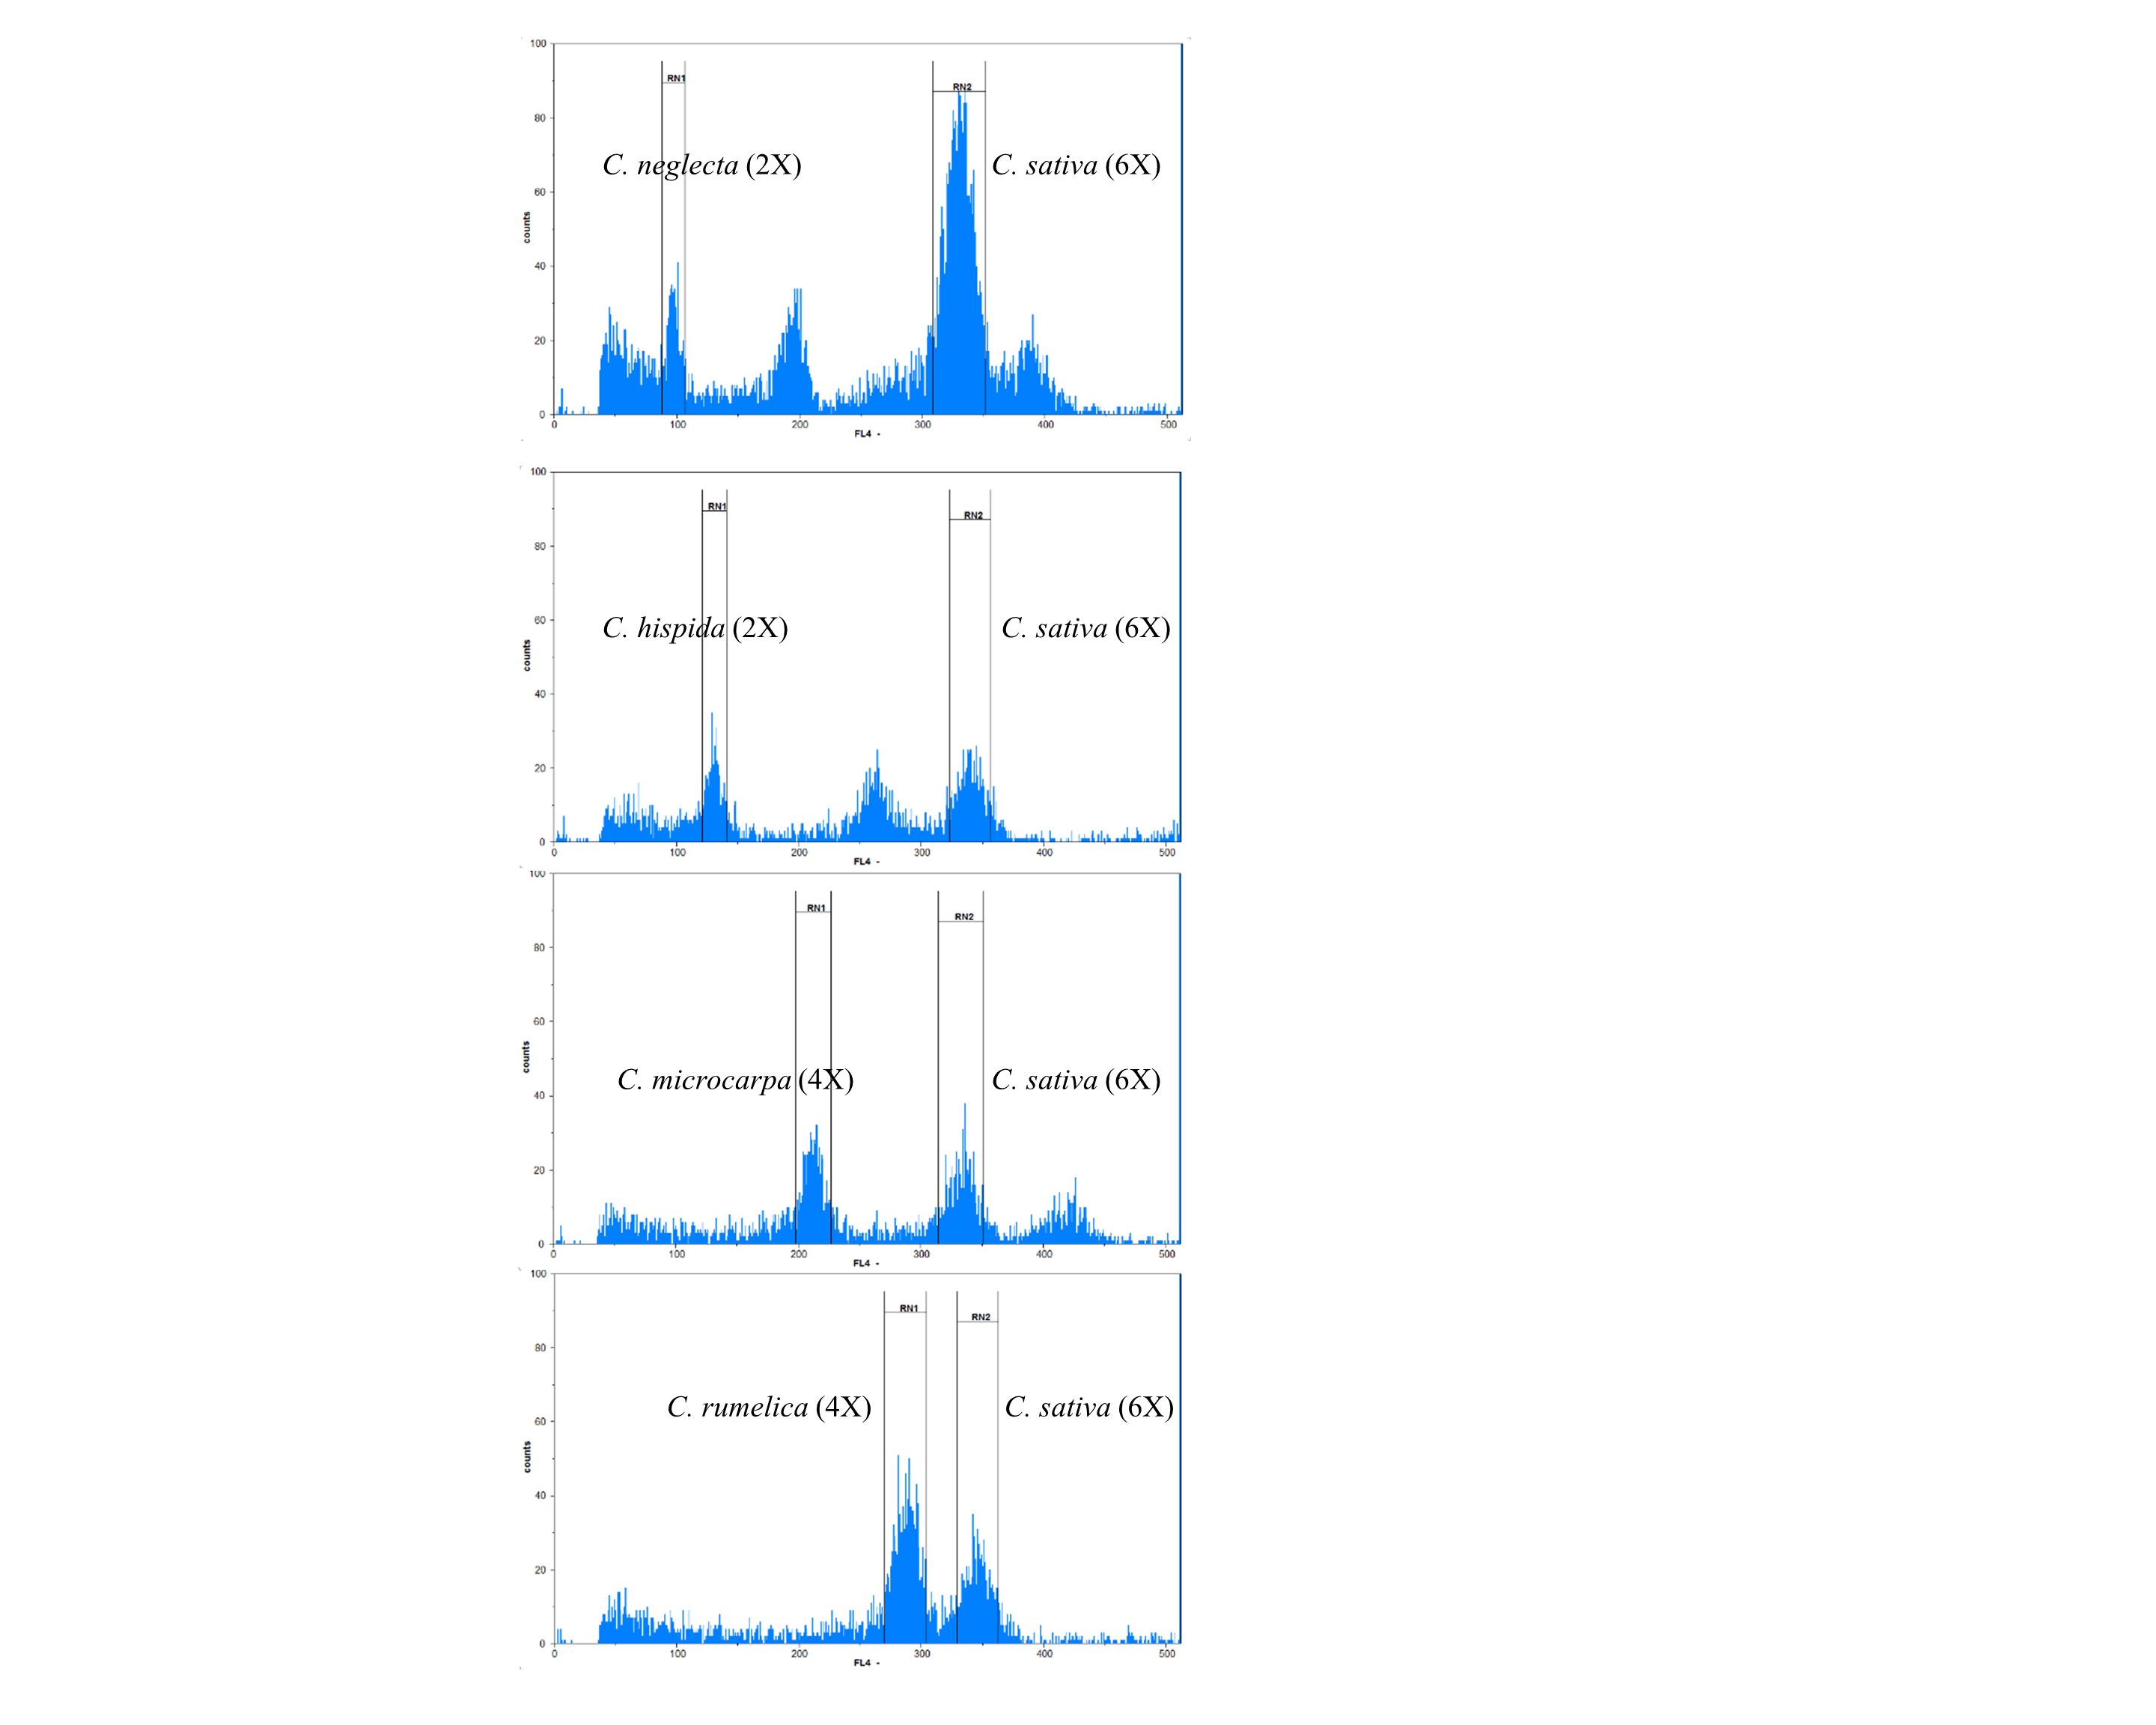


Figure S2. Number of SNPs including *indels* after filtering with 1% minor allele frequency and different level of missing percentage

###

Figure S3. Principle coordinate analysis of 169 *Camelina* genotype with 20 chromosomes based on 1399 SNPs


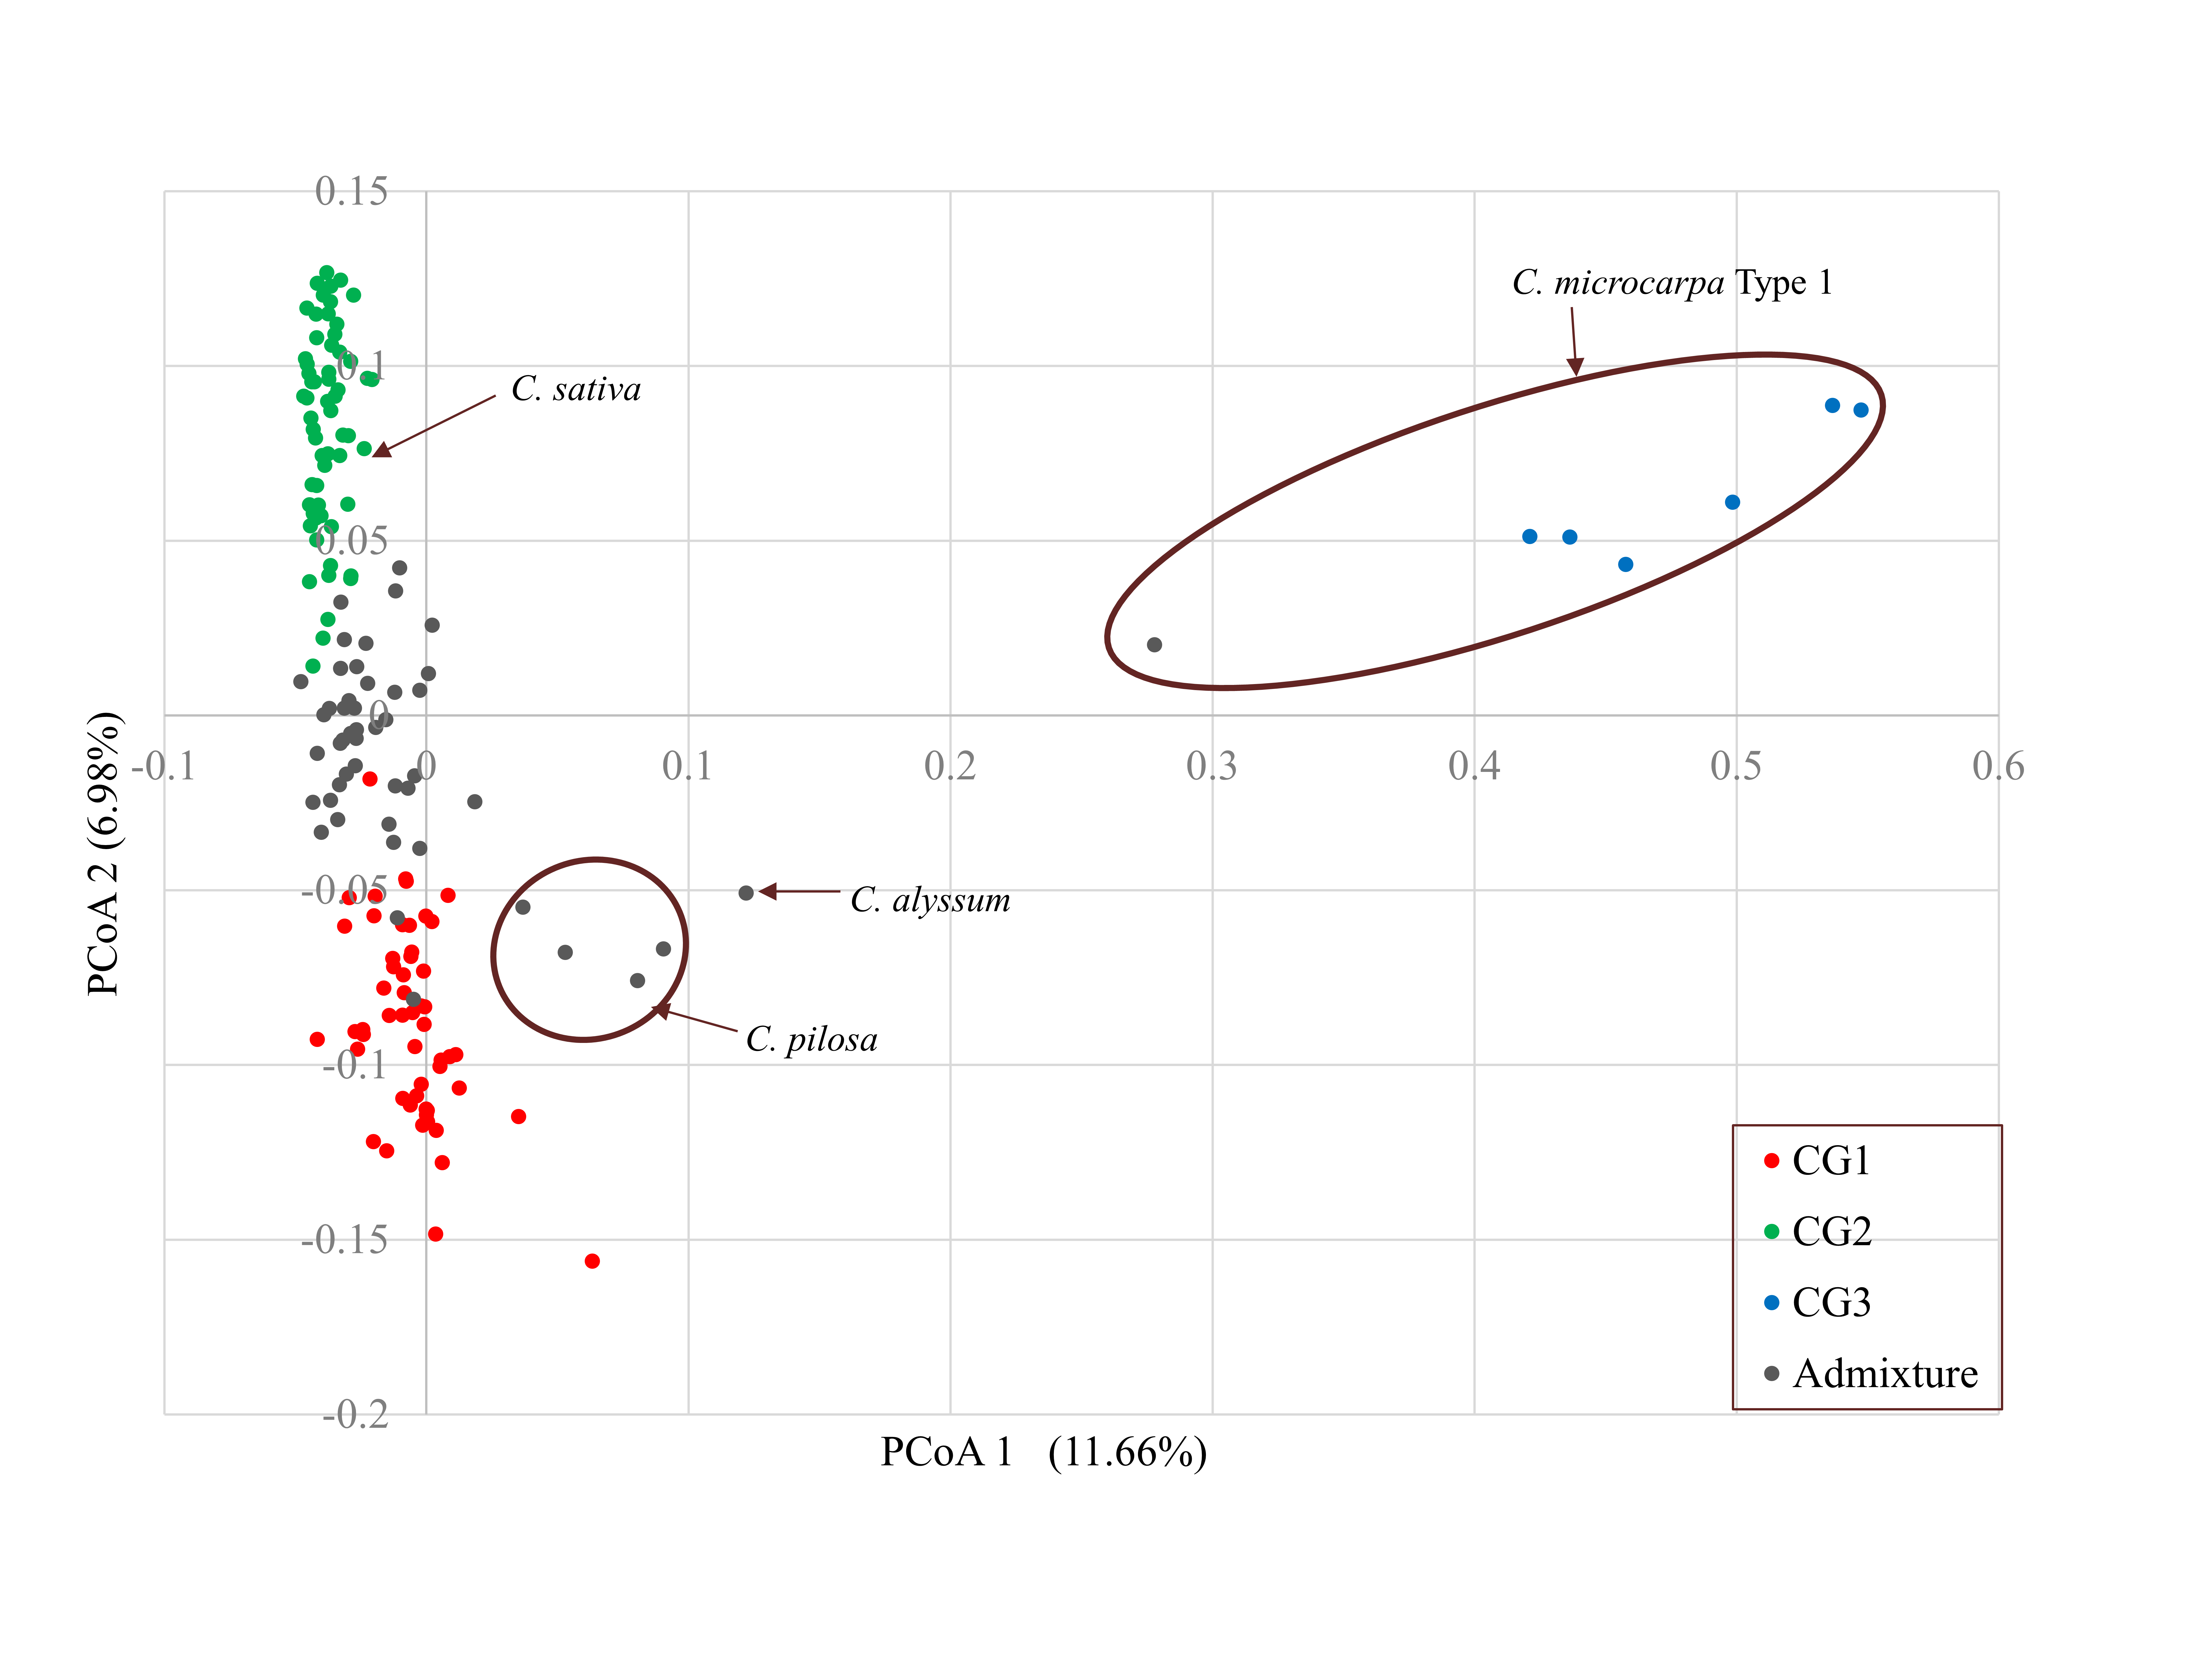


Figure S4. DeltaK value to differentiate population structure in *Camelina* species with 20 chromosomes


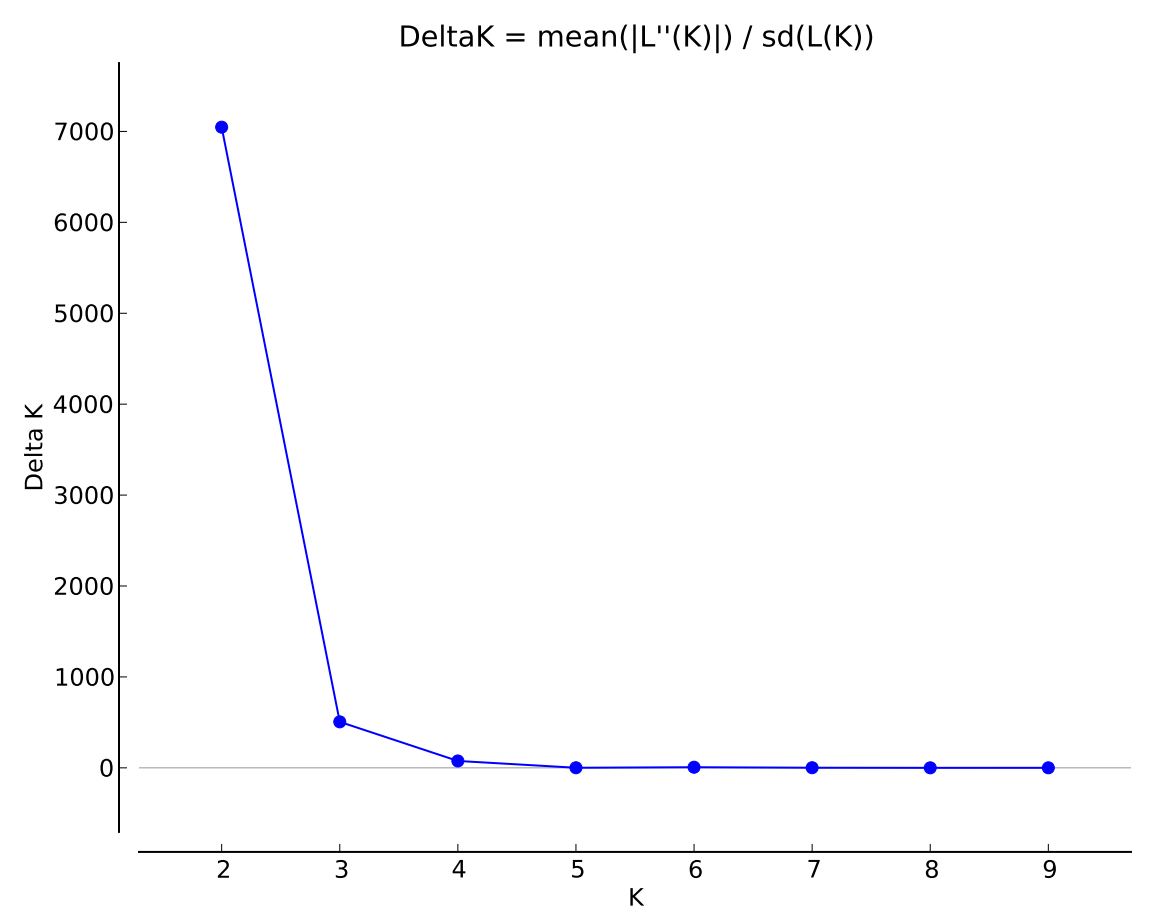


Figure S5. Molecular Phylogenetic analysis by Maximum Likelihood method among 193 *Camelina* accessions based on 4268 SNPs
